# Supplementary material
Source: publisher figshare collection journal article supplement (https://springernature.figshare.com/ndownloader/files/27611504)
Supplement: Supplementary file [file 27611504]

**Table S4: Putative  $\alpha$  and  $\beta$  globin genes from teleosts and *Xenopus tropicalis* used to generate phylogenetic trees**

| Species                       | Ensembl gene ID     | Assigned globin name | Chromosome/Linkage group | Start position | Stop Position | Strand  |
|-------------------------------|---------------------|----------------------|--------------------------|----------------|---------------|---------|
| <i>Gasterosteus aculeatus</i> | ENSGACG00000013869  | GacGroupXIa1         | groupXI                  | 13640461       | 13641149      | pos     |
| <i>Gasterosteus aculeatus</i> | ENSGACG00000013871  | GacGroupXIb1         | groupXI                  | 13642596       | 13643293      | neg     |
| <i>Gasterosteus aculeatus</i> | ENSGACG00000013873  | GacGroupXIa2         | groupXI                  | 13644467       | 13645155      | pos     |
| <i>Gasterosteus aculeatus</i> | ENSGACG00000013876  | GacGroupXIb2         | groupXI                  | 13646453       | 13647149      | neg     |
| <i>Gasterosteus aculeatus</i> | ENSGACG00000013880  | GacGroupXIa3         | groupXI                  | 13649883       | 13650298      | pos     |
| <i>Gasterosteus aculeatus</i> | ENSGACG00000013882  | GacGroupXIb3         | groupXI                  | 13651607       | 13652304      | neg     |
| <i>Gasterosteus aculeatus</i> | ENSGACG00000013889  | GacGroupXIa4         | groupXI                  | 13653435       | 13654112      | pos     |
| <i>Gasterosteus aculeatus</i> | ENSGACG00000013891  | GacGroupXIb4         | groupXI                  | 13655329       | 13656035      | neg     |
| <i>Gasterosteus aculeatus</i> | ENSGACG00000013895  | GacGroupXIb5         | groupXI                  | 13659406       | 13660115      | neg     |
| <i>Gasterosteus aculeatus</i> | ENSGACG00000013902  | GacGroupXIa5         | groupXI                  | 13661206       | 13661964      | pos     |
| <i>Gasterosteus aculeatus</i> | ENSGACG00000013918  | GacGroupXIb6         | groupXI                  | 13662623       | 13663375      | neg     |
| <i>Danio rerio</i>            | ENSDARG00000069734  | DreChr3b1            | 3                        | 53994984       | 53995703      | neg     |
| <i>Danio rerio</i>            | ENSDARG00000069735  | DreChr3a1            | 3                        | 53997339       | 53998149      | pos     |
| <i>Danio rerio</i>            | ENSDARG00000077603  | DreChr3b2            | 3                        | 54002211       | 54003026      | neg     |
| <i>Danio rerio</i>            | ENSDARG00000079078  | DreChr3a2            | 3                        | 54003866       | 54009713      | pos     |
| <i>Danio rerio</i>            | ENSDARG00000078255  | DreChr3b3            | 3                        | 54007199       | 54008014      | neg     |
| <i>Danio rerio</i>            | ENSDARG00000069747  | DreChr3b4            | 3                        | 54017851       | 54035806      | pos     |
| <i>Danio rerio</i>            | ENSDARG00000077925  | DreChr3a3            | 3                        | 54024137       | 54024820      | neg     |
| <i>Danio rerio</i>            | ENSDARG00000075934  | DreChr3a4            | 3                        | 54031030       | 54042878      | neg     |
| <i>Danio rerio</i>            | ENSDARG00000079305  | DreChr3a5            | 3                        | 54050356       | 54051485      | neg     |
| <i>Danio rerio</i>            | ENSDARG00000045142  | DreChr12a1           | 12                       | 19434748       | 19435868      | neg     |
| <i>Danio rerio</i>            | ENSDARG00000045143  | DreChr12b1           | 12                       | 19437688       | 19438419      | pos     |
| <i>Danio rerio</i>            | ENSDARG00000038147  | DreChr12b2           | 12                       | 19447742       | 19448842      | pos     |
| <i>Danio rerio</i>            | ENSDARG00000045144  | DreChr12a2           | 12                       | 19451012       | 19452198      | neg     |
| <i>Tetraodon nigroviridis</i> | ENSTNIG00000018576  | TniChr3a1            | 3                        | 12162065       | 12163192      | pos     |
| <i>Tetraodon nigroviridis</i> | ENSTNIG00000018577  | TniChr3a2            | 3                        | 12165258       | 12166008      | pos     |
| <i>Tetraodon nigroviridis</i> | ENSTNIG00000012914  | TniChr2a1            | 2                        | 5887493        | 5888390       | neg     |
| <i>Tetraodon nigroviridis</i> | ENSTNIG00000012912  | TniChr2a2            | 2                        | 5891745        | 5893323       | neg     |
| <i>Oryzias latipes</i>        | ENSORLG00000005210  | OlaChr8a1            | 8                        | 8382315        | 8408350       | neg     |
| <i>Oryzias latipes</i>        | ENSORLG00000005230  | OlaChr8b1            | 8                        | 8384089        | 8409968       | pos     |
| <i>Oryzias latipes</i>        | ENSORLG00000005248  | OlaChr8b2            | 8                        | 8388874        | 8389479       | neg     |
| <i>Oryzias latipes</i>        | ENSORLG00000005267  | OlaChr8a2            | 8                        | 8390431        | 8391008       | pos     |
| <i>Oryzias latipes</i>        | ENSORLG00000005283  | OlaChr8b3            | 8                        | 8404752        | 8405453       | neg     |
| <i>Oryzias latipes</i>        | ENSORLG00000005297  | OlaChr8a3            | 8                        | 8411256        | 8412025       | neg     |
| <i>Oryzias latipes</i>        | ENSORLG00000002990  | OlaChr19a1           | 19                       | 1478030        | 1480828       | pos     |
| <i>Oryzias latipes</i>        | ENSORLG00000003020  | OlaChr19b1           | 19                       | 1484415        | 1562342       | neg     |
| <i>Oryzias latipes</i>        | ENSORLG00000003046  | OlaChr19a2           | 19                       | 1486753        | 1487847       | pos     |
| <i>Xenopus tropicalis</i>     | ENSXETG000000024628 | XtrScaffold_733b1    | scaffold_733             | 222200         | 223401        | pos     |
| <i>Xenopus tropicalis</i>     | ENSXETG000000011556 | XtrScaffold_733b2    | scaffold_733             | 295422         | 296469        | pos     |
| <i>Xenopus tropicalis</i>     | ENSXETG000000024627 | XtrScaffold_733b3    | scaffold_733             | 308259         | 309374        | pos     |
| <i>Xenopus tropicalis</i>     | ENSXETG000000024626 | XtrScaffold_733b4    | scaffold_733             | 334930         | 336634        | pos     |
| <i>Xenopus tropicalis</i>     | ENSXETG000000025667 | XtrScaffold_357b1    | scaffold_357             | 931132         | 932667        | neg     |
| <i>Xenopus tropicalis</i>     | ENSXETG000000025664 | XtrScaffold_357a1    | scaffold_357             | 939457         | 940502        | neg     |
| <i>Xenopus tropicalis</i>     | ENSXETG000000025663 | XtrScaffold_357a2    | scaffold_357             | 952535         | 956311        | neg     |
| <i>Xenopus tropicalis</i>     | ENSXETG000000001141 | XtrScaffold_357a3    | scaffold_357             | 973850         | 975539        | neg     |
| <i>Xenopus tropicalis</i>     | ENSXETG000000025662 | XtrScaffold_357a4    | scaffold_357             | 1003882        | 1005964       | neg     |
| <i>Xenopus tropicalis</i>     | ENSXETG000000025661 | XtrScaffold_357a5    | scaffold_357             | 1015409        | 1016929       | neg     |
| <i>Xenopus tropicalis</i>     | ENSXETG000000001139 | XtrScaffold_357a6    | scaffold_357             | 1031753        | 1032272       | neg     |
| <i>Xenopus tropicalis</i>     | ENSXETG000000001137 | XtrScaffold_357a7    | scaffold_357             | 1133361        | 1134743       | neg     |
| <i>Oncorhynchus mykiss</i>    | GenBank: AB015448   | Omya2emb             | Unknown                  | Unknown        | Unknown       | Unknown |
| <i>Oncorhynchus mykiss</i>    | GenBank: AB105449   | Omya1emb             | Unknown                  | Unknown        | Unknown       | Unknown |
| <i>Oncorhynchus mykiss</i>    | GenBank: AB015450   | Omyb1emb             | Unknown                  | Unknown        | Unknown       | Unknown |
| <i>Oncorhynchus mykiss</i>    | GenBank: AB015451   | Omyb2emb             | Unknown                  | Unknown        | Unknown       | Unknown |
